# Supplementary material
Source: MDPI journal article supplement (https://www.mdpi.com/2071-1050/11/18/4844)
Supplement: s1 [file s1]

## Supplementary Material

**Table S1.** Absorbances at 465 nm and 665 nm in soil solution extracted with commercial humic substances solution at different rates and adjusted pH conditions. Mean  $\pm$  standard deviation,  $n = 3$ . Values within a column followed by the same capital letter are not significantly different between different HS rates ( $p < 0.05$ ). Values within a row followed by the same lower-case letter are not significantly different between different pH conditions ( $p < 0.05$ ).

| Treatment              | Abs 465 nm        |                    |                   | Abs 665 nm        |                   |                   |
|------------------------|-------------------|--------------------|-------------------|-------------------|-------------------|-------------------|
|                        | pH 4.5            | pH 6.0             | pH 8.0            | pH 4.5            | pH 6.0            | pH 8.0            |
| HS0 <sup>1</sup>       | 0.09Ab $\pm$ 0.01 | 0.08Aab $\pm$ 0.00 | 0.07Aa $\pm$ 0.00 | 0.13Aa $\pm$ 0.00 | 0.12Aa $\pm$ 0.01 | 0.11Aa $\pm$ 0.01 |
| HS0.5                  | 0.08Aa $\pm$ 0.00 | 0.08Aa $\pm$ 0.01  | 0.08Aa $\pm$ 0.00 | 0.13Aa $\pm$ 0.01 | 0.12Aa $\pm$ 0.01 | 0.12Aa $\pm$ 0.00 |
| HS2                    | 0.10Aa $\pm$ 0.00 | 0.11Aa $\pm$ 0.01  | 0.11Aa $\pm$ 0.01 | 0.12Aa $\pm$ 0.00 | 0.13Aa $\pm$ 0.01 | 0.12Aa $\pm$ 0.01 |
| HS10                   | 0.22Ba $\pm$ 0.03 | 0.44Ba $\pm$ 0.02  | 0.89Bb $\pm$ 0.21 | 0.13Aa $\pm$ 0.01 | 0.18Ba $\pm$ 0.00 | 0.27Bb $\pm$ 0.05 |
|                        | <i>df</i>         | <i>F</i>           |                   | <i>df</i>         | <i>F</i>          |                   |
| Treatment <sup>2</sup> | 3                 | 65.907 ***         |                   | 3                 | 35.716 ***        |                   |
| pH                     | 2                 | 9.547 **           |                   | 2                 | 3.803 NS          |                   |
| Treatm *pH             | 6                 | 12.860 ***         |                   | 6                 | 12.187 ***        |                   |

<sup>1</sup> Rates of commercial humic substances (HS): 0, 0.5, 2 and 10 g kg<sup>-1</sup>. <sup>2</sup> Two-Way ANOVA: *df*, degree of freedom; \*\*  $p < 0.01$ ; \*\*\*  $p < 0.001$ ; NS, not significant.
